# Supplementary material
Source: PubMed Central journal article supplement (PMC2292246)
Supplement: NIHMS43882-supplement-supplement.pdf [file NIHMS43882-supplement-supplement.pdf]

Supplementary Table 1. *S. cerevisiae* strains used in this study

| Strain name | Genotype                                                                                                                          |
|-------------|-----------------------------------------------------------------------------------------------------------------------------------|
| BY4742      | <i>MAT<math>\alpha</math> his3<math>\Delta</math>1 leu2<math>\Delta</math>0 lys2<math>\Delta</math>0 ura3<math>\Delta</math>0</i> |
| GSY188      | BY4742 <i>ubc4::HIS3</i>                                                                                                          |
| GSY90       | BY4742 <i>ubc 13::kanMX</i>                                                                                                       |
| GSY91       | BY4742 <i>mms2::kanMX</i>                                                                                                         |
| GSY92       | BY4742 <i>ubc5::kanMX</i>                                                                                                         |
| GSY93       | BY4742 <i>ubc7::kanMX</i>                                                                                                         |
| GSY94       | BY4742 <i>ubc8::kanMX</i>                                                                                                         |
| GSY95       | BY4742 <i>ubc11::kanMX</i>                                                                                                        |
| GSY96       | BY4742 <i>pex4::kanMX</i>                                                                                                         |
| GSY97       | BY4742 <i>rad6::kanMX</i>                                                                                                         |
| GSY98       | BY4742 <i>chf1::kanMX</i>                                                                                                         |
| GSY189      | BY4742 <i>ubc1::natMX</i>                                                                                                         |
| GSY190      | BY4742 <i>ubc13::kanMX ubc4::HIS3</i>                                                                                             |
| GSY191      | BY4742 <i>mms2::kanMX ubc4::HIS3</i>                                                                                              |

Supplementary Table 2. Plasmids used in this study.

| Name  | Gene                            | Vector   | Reference                  |
|-------|---------------------------------|----------|----------------------------|
| pB299 | <i>CHF1</i>                     | p425GAL1 | (Bieganowski et al., 2004) |
| pC105 | <i>CHF2</i>                     | p425GAL1 | This study                 |
| pC110 | <i>MMS2</i>                     | pSGAO4   | This study                 |
| pC111 | <i>UBC13</i>                    | pGEX4T-2 | This study                 |
| pC114 | <i>chf1-C345S,H350A</i>         | pGEX4T-2 | This study                 |
| pC115 | <i>chf1-G192E</i>               | pGEX4T-2 | This study                 |
| pC116 | <i>chf1-S220A,H223L</i>         | pGEX4T-2 | This study                 |
| pC117 | <i>chf2-C451S,H456A</i>         | pGEX4T-2 | This study                 |
| pC118 | <i>chf2-S326A,H329L</i>         | pGEX4T-2 | This study                 |
| pC119 | <i>chf2-G298E</i>               | pGEX4T-2 | This study                 |
| pC145 | <i>Z-CHF1</i>                   | p425GAL1 | This study                 |
| pC146 | <i>Z-CHF2</i>                   | p425GAL1 | This study                 |
| pC153 | <i>Z-chf1-K313R, K317R</i>      | p425GAL1 | This study                 |
| pC155 | <i>Z-chf1-K260R</i>             | p425GAL1 | This study                 |
| pC156 | <i>Z-chf1-K237R, K240R</i>      | p425GAL1 | This study                 |
| pC157 | <i>Z-chf1-K204R</i>             | p425GAL1 | This study                 |
| pC158 | <i>Z-chf1-K306R</i>             | p425GAL1 | This study                 |
| pC159 | <i>Z-chf1-K306R,K313R,K317R</i> | p425GAL1 | This study                 |
| pC160 | <i>Z-chf1-K306R,K237R,K240R</i> | p425GAL1 | This study                 |

Bieganowski, P., Shilinski, K., Tschlis, P. N., and Brenner, C. (2004). Cdc123 and checkpoint forkhead associated with RING proteins control the cell cycle by controlling eIF2gamma abundance. *J Biol Chem* 279, 44656-44666.

Supplementary Table 3. Ubiquitinated peptides identified by LC-MS/MS

| Chf1 + Ubc4                             |                              |                                |              |       |
|-----------------------------------------|------------------------------|--------------------------------|--------------|-------|
| Ub sites                                | Peptides                     | Charge<br>(M+nH) <sup>n+</sup> | MMA<br>(PPM) | XCorr |
| Chf1 K150                               | M*DK#HGLFSIR                 | 2                              | 0.91         | 2.48  |
| Chf1 K204                               | EAISK#IPDQYHPVVK             | 2                              | 5.42         | 3.83  |
| Chf1 K217                               | THGCFK#VDDQGNWFLK            | 3                              | -2.73        | 2.99  |
| Chf1 K237                               | VDDQGNWFLK#DVK               | 3                              | -3.95        | 5.19  |
| Chf1 K240                               | DVK#SSSGTFLNHQR              | 2                              | 3.78         | 3.91  |
| Chf1 K260                               | LSSASTTSK#DYLLHDGDIIQLGM*DFR | 3                              | 3.07         | 5.86  |
| Chf1<br>K300/K306                       | LK#ANAFNK#EALSR              | 3                              | -0.11        | 4.48  |
| Chf1 K306                               | ANAFNK#EALSR                 | 2                              | -4.72        | 3.83  |
| Chf1<br>K313/K317                       | IK#NLQK#LTTGLEQEDCSICLNK     | 3                              | -0.07        | 6.83  |
| Chf1 K317                               | NLQK#LTTGLEQEDCSICLNK        | 3                              | -1.82        | 6.72  |
| Ub K48                                  | LIFAGK#QLEDGR                | 2                              | 0.73         | 3.68  |
| Ub K63                                  | TLSDYNIQK#ESTLHLVLR          | 3                              | -0.28        | 3.32  |
| Chf1 + Ubc13/Mms2                       |                              |                                |              |       |
| Chf1 K237                               | VDDQGNWFLK#DVK               | 3                              | 9.13         | 3.95  |
| Chf1 K306                               | ANAFNK#EALSR                 | 2                              | 11.73        | 2.73  |
| Ub K63                                  | TLSDYNIQK#ESTLHLVLR          | 3                              | 3.8          | 2.88  |
| Chf1 transubiquitination by Chf2 + Ubc4 |                              |                                |              |       |
| Chf1 K204                               | EAISK#IPDQYHPVVK             | 3                              | 6.14         | 2.82  |
| Chf1 K306                               | ANAFNK#EALSR                 | 2                              | 9.54         | 3.43  |
| Ub K48                                  | LIFAGK#QLEDGR                | 2                              | 11.16        | 3.68  |
| Chf2 + Ubc4                             |                              |                                |              |       |
| Chf2 K211                               | NIVGGADGSTIVNNSQEMYK#NLR     | 3                              | -1.1         | 3.46  |
| Chf2 K258                               | KDK#HGLFSIR                  | 2                              | -3.71        | 3.15  |
| Chf2 K288                               | K#AGPGSQLVIGR                | 2                              | -1.56        | 4.09  |
| Chf2 K310                               | DAISK#IPEQYHPVVK             | 3                              | -3.01        | 3.43  |
| Chf2 K310                               | VRDAISK#IPEQYHPVVK           | 3                              | -1.73        | 5.28  |
| Chf2 K333                               | HGCFK#VDSQGNWYIK             | 3                              | -2.39        | 3.98  |
| Chf2 K343                               | VDSQGNWYIK#DVK               | 2                              | -2.13        | 3.93  |
| Chf2 K346                               | DVK#SSSGTFLNHQR              | 2                              | 0.82         | 3.97  |
| Chf2 K366                               | LSPASSLSK#DTPLR              | 3                              | -6.98        | 2.79  |
| Chf2 K366                               | LSPASSLSK#DTPLRDGDILQLGM*DFR | 3                              | -2.6         | 5.38  |
| Chf2<br>K406,K412                       | LK#ANSFNK#EALQR              | 3                              | -6.59        | 3.20  |
| Chf2 K412                               | ANSFNK#EALQR                 | 2                              | 1.28         | 3.28  |
| Chf2 K423                               | LQNLQK#LTTGIEEEDCSICLCK      | 3                              | 2.75         | 6.37  |

|        |                     |   |       |      |
|--------|---------------------|---|-------|------|
| Ub K48 | LIFAGK#QLEDGR       | 2 | -0.62 | 3.97 |
| Ub K63 | TLSDYNIQK#ESTLHLVLR | 3 | -0.88 | 4.08 |

---

Chf2 + Ubc13/Mms2

|           |                     |   |       |      |
|-----------|---------------------|---|-------|------|
| Chf2 K258 | KDK#HGLFSIR         | 3 | 10.88 | 3.34 |
| Chf2 K310 | DAISK#IPEQYHPVVK    | 3 | 10.66 | 3.00 |
| Chf2 K346 | DVK#SSSGTFLNHQR     | 3 | 9.39  | 2.80 |
| Chf2 K366 | LSPASSLSK#DTPLR     | 2 | 10.42 | 2.55 |
| Ub K63    | TLSDYNIQK#ESTLHLVLR | 2 | 12.21 | 4.33 |

---

Chf2 transubiquitination by Chf1 + Ubc4

|           |                          |   |       |      |
|-----------|--------------------------|---|-------|------|
| Chf2 K211 | NIVGGADGSTIVNNSQEMYK#NLR | 3 | 7.18  | 2.72 |
| Chf2 K256 | K#DKHGLFSIR              | 2 | 11.23 | 2.57 |
| Chf2 K288 | K#AGPGSQLVIGR            | 2 | 8.79  | 4.04 |
| Chf2 K310 | DAISK#IPEQYHPVVK         | 3 | 11.39 | 2.71 |
| Chf2 K343 | VDSQGNWYIK#DVK           | 3 | 9.2   | 3.52 |
| Chf2 K366 | LSPASSLSK#DTPLR          | 2 | 12.96 | 3.33 |
| Chf2 K412 | LKANSFNK#EALQR           | 3 | 8.98  | 2.81 |
| Ub K48    | LIFAGK#QLEDGR            | 2 | 10.41 | 3.86 |

\* Oxidation (+/- 15.99644 Da)

# GlyGly (114.05421 Da)
